# Supplementary material for: Immune‐Array Analysis in Sporadic Inclusion Body Myositis Reveals HLA–DRB1 Amino Acid Heterogeneity Across the Myositis Spectrum
Source: PubMed Central journal article supplement (PMC5516174; doi:10.1002/art.40045), 2017-04-04
Supplement: ART-69-1090-s001.pdf [file ART-69-1090-s001.pdf]

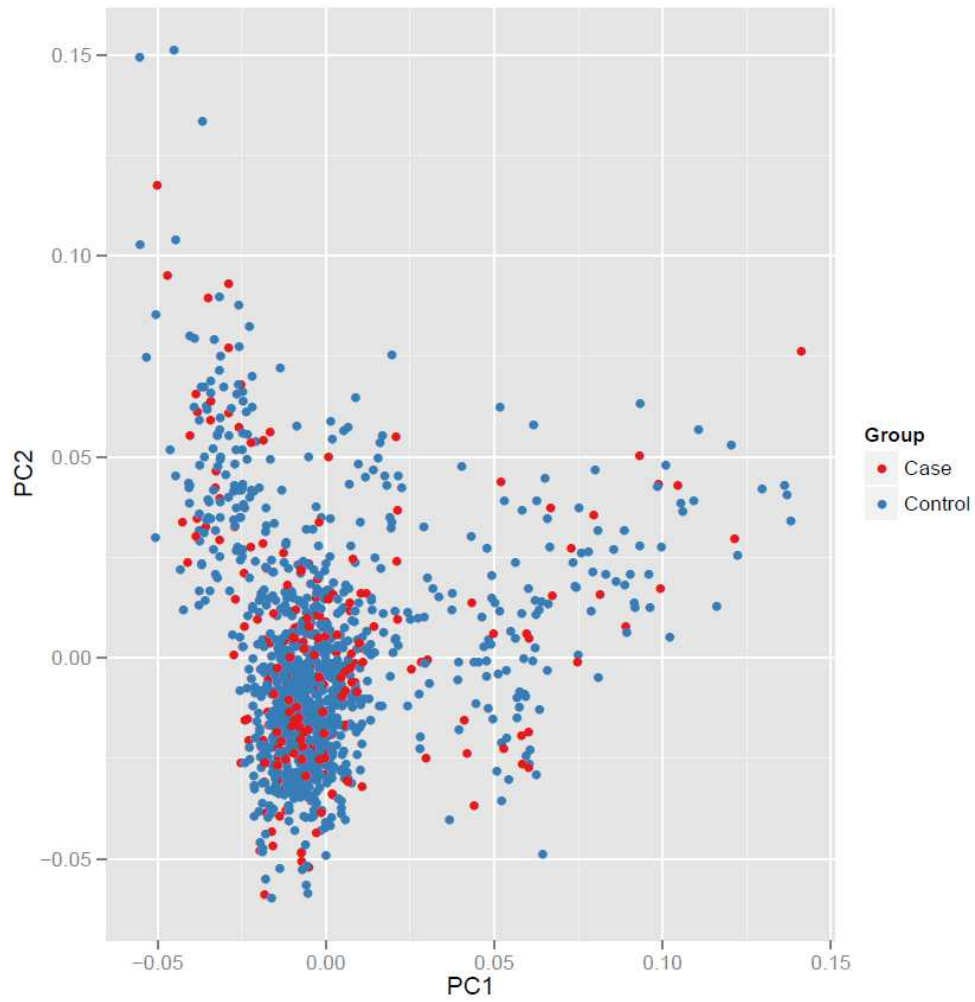

**Supplementary Figure 1 - First two principal components of 252 IBM cases and 1,008 ethnically matched controls.**

First two principal components of 252 inclusion body myositis cases and 1,008 ethnically matched controls.  $\lambda=1.04$  indicates cases and controls are well matched for ethnicity.

| RS Number   | Coordinates   | r <sup>2</sup> | RegulomeDB | Function   | ImmunoChip P-Value |
|-------------|---------------|----------------|------------|------------|--------------------|
| rs112088397 | chr3:46389462 | Index          | 5          | NA         | 1.93E-06           |
| rs58697594  | chr3:46275570 | 1              | 4          | NA         | 3.52E-05           |
| rs73833032  | chr3:46276490 | 1              | 6          | NA         | 2.06E-05           |
| rs73833033  | chr3:46277002 | 1              | 6          | NA         | 1.41E-05           |
| rs74433128  | chr3:46279933 | 1              | 6          | NA         | 7.66E-06           |
| rs76733709  | chr3:46281461 | 1              | .          | NA         | 5.97E-06           |
| rs113676185 | chr3:46286046 | 1              | .          | NA         | .                  |
| rs60020651  | chr3:46287651 | 1              | .          | NA         | 1.41E-05           |
| rs146309725 | chr3:46290767 | 1              | .          | NA         | .                  |
| rs145617407 | chr3:46293070 | 1              | 5          | NA         | .                  |
| rs75994669  | chr3:46300863 | 1              | .          | NA         | 1.02E-05           |
| rs79539493  | chr3:46302938 | 1              | 5          | NA         | 1.02E-05           |
| rs138814707 | chr3:46317354 | 1              | 6          | NA         | .                  |
| rs78372062  | chr3:46323679 | 1              | .          | NA         | 6.23E-06           |
| rs78729754  | chr3:46339185 | 1              | 2b         | NA         | 7.66E-06           |
| rs80054040  | chr3:46340285 | 1              | 5          | NA         | .                  |
| rs79629761  | chr3:46340630 | 1              | 5          | NA         | 6.39E-06           |
| rs75352297  | chr3:46345151 | 1              | .          | NA         | 5.92E-06           |
| rs368945717 | chr3:46345341 | 1              | .          | NA         | .                  |
| rs57093591  | chr3:46350716 | 1              | .          | NA         | 9.44E-06           |
| rs113507038 | chr3:46357822 | 1              | 5          | NA         | 5.53E-06           |
| rs112384491 | chr3:46360359 | 1              | .          | NA         | .                  |
| rs113647051 | chr3:46366857 | 1              | 6          | NA         | .                  |
| rs3092960   | chr3:46400062 | 1              | 2b         | synonymous | 4.60E-06           |
| rs762790    | chr3:46402688 | 1              | 4          | NA         | 7.14E-06           |
| rs3136535   | chr3:46409113 | 1              | 6          | NA         | .                  |
| rs41490645  | chr3:46410137 | 1              | 4          | NA         | .                  |
| rs2856758   | chr3:46411661 | 1              | 4          | NA         | 8.15E-06           |
| rs11575821  | chr3:46422355 | 1              | 1f         | NA         | 8.45E-06           |
| rs7652037   | chr3:46423063 | 1              | 6          | NA         | 9.57E-06           |
| rs34291293  | chr3:46425647 | 1              | 3a         | NA         | 9.57E-06           |
| rs34445878  | chr3:46425711 | 1              | 3a         | NA         | .                  |
| rs113263161 | chr3:46425718 | 1              | 2b         | NA         | .                  |
| rs34971514  | chr3:46427354 | 1              | .          | NA         | .                  |
| rs111669359 | chr3:46427616 | 1              | 4          | NA         | .                  |
| rs6787972   | chr3:46427835 | 1              | 4          | NA         | 1.23E-05           |
| rs11298823  | chr3:46428089 | 1              | 4          | NA         | .                  |
| rs112359020 | chr3:46429391 | 1              | 5          | NA         | .                  |
| rs35388950  | chr3:46429679 | 1              | .          | NA         | .                  |
| rs75630441  | chr3:46429717 | 1              | 6          | NA         | .                  |
| rs113634435 | chr3:46431695 | 1              | 6          | NA         | .                  |
| rs111713092 | chr3:46431751 | 1              | 5          | NA         | .                  |
| rs113934302 | chr3:46432856 | 1              | .          | NA         | .                  |
| rs111961837 | chr3:46433146 | 1              | .          | NA         | .                  |
| rs112982903 | chr3:46433247 | 1              | 5          | NA         | .                  |
| rs112368251 | chr3:46433967 | 1              | 5          | NA         | .                  |
| rs113229741 | chr3:46433987 | 1              | 5          | NA         | .                  |
| rs113255842 | chr3:46435161 | 1              | 3a         | NA         | 7.80E-06           |
| rs6798291   | chr3:46443931 | 1              | 6          | NA         | 6.24E-06           |

|             |               |      |    |            |          |
|-------------|---------------|------|----|------------|----------|
| rs916093    | chr3:46444794 | 1    | 6  | NA         | 1.03E-05 |
| rs916094    | chr3:46444835 | 1    | 6  | NA         | 9.34E-06 |
| rs112903945 | chr3:46445343 | 1    | 6  | NA         | 6.45E-06 |
| rs11574428  | chr3:46446721 | 1    | 1f | NA         | 6.45E-06 |
| rs11574429  | chr3:46446810 | 1    | 4  | NA         | 6.45E-06 |
| rs11574434  | chr3:46447915 | 1    | 3a | NA         | .        |
| rs6808835   | chr3:46449864 | 1    | 5  | synonymous | .        |
| rs6441977   | chr3:46450072 | 1    | 5  | missense   | 6.45E-06 |
| rs1140865   | chr3:46450884 | 1    | .  | NA         | 5.87E-06 |
| rs2157061   | chr3:46451502 | 1    | 5  | NA         | 5.87E-06 |
| rs2157062   | chr3:46451647 | 1    | 1f | NA         | .        |
| rs6762266   | chr3:46452863 | 1    | 1f | NA         | 5.87E-06 |
| rs6770674   | chr3:46452873 | 1    | 5  | NA         | .        |
| rs112384806 | chr3:46453487 | 1    | 5  | NA         | .        |
| rs113774564 | chr3:46454682 | 1    | 5  | NA         | 5.87E-06 |
| rs113069082 | chr3:46454688 | 1    | 5  | NA         | .        |
| rs375524839 | chr3:46454910 | 1    | .  | NA         | .        |
| rs111514151 | chr3:46455754 | 1    | 5  | NA         | 5.47E-06 |
| rs66928113  | chr3:46455996 | 1    | .  | NA         | .        |
| rs113942981 | chr3:46457329 | 1    | 5  | NA         | 6.23E-06 |
| rs113490452 | chr3:46458228 | 1    | 4  | NA         | .        |
| rs6782522   | chr3:46458505 | 1    | 5  | NA         | .        |
| rs6791599   | chr3:46458942 | 1    | 1f | NA         | 5.87E-06 |
| rs111959715 | chr3:46459050 | 1    | 6  | NA         | 5.87E-06 |
| rs6791789   | chr3:46459121 | 1    | .  | NA         | 6.14E-06 |
| rs113365357 | chr3:46459291 | 1    | 4  | NA         | 6.86E-06 |
| rs112870257 | chr3:46459398 | 1    | 5  | NA         | .        |
| rs113888916 | chr3:46459411 | 1    | 5  | NA         | .        |
| rs113710186 | chr3:46459914 | 1    | 4  | NA         | 5.87E-06 |
| rs111958022 | chr3:46459956 | 1    | 4  | NA         | .        |
| rs113064717 | chr3:46460013 | 1    | 4  | NA         | 5.87E-06 |
| rs111410234 | chr3:46460675 | 1    | .  | NA         | .        |
| rs112712359 | chr3:46461783 | 1    | 6  | NA         | 7.27E-06 |
| rs79815064  | chr3:46277577 | 0.95 | .  | NA         | .        |
| rs11574435  | chr3:46447972 | 0.95 | 4  | NA         | 1.01E-04 |
| rs75719572  | chr3:46183180 | 0.91 | 5  | NA         | 3.61E-06 |
| rs112720180 | chr3:46193899 | 0.91 | .  | NA         | .        |
| rs112338830 | chr3:46193902 | 0.91 | .  | NA         | .        |
| rs4452362   | chr3:46470654 | 0.91 | 5  | NA         | .        |
| rs112479910 | chr3:46471119 | 0.91 | 5  | NA         | .        |
| rs113595266 | chr3:46471525 | 0.91 | 3a | NA         | .        |
| rs4453882   | chr3:46472651 | 0.91 | .  | NA         | .        |
| rs7645306   | chr3:46474670 | 0.91 | 4  | NA         | .        |
| rs77648833  | chr3:46474955 | 0.91 | 4  | NA         | .        |
| rs75820382  | chr3:46475122 | 0.91 | 5  | NA         | 1.18E-05 |
| rs56063910  | chr3:46477826 | 0.91 | 6  | NA         | 1.20E-05 |
| rs75094754  | chr3:46477830 | 0.91 | 6  | NA         | 1.20E-05 |
| rs111960587 | chr3:46482049 | 0.91 | 5  | NA         | 1.35E-05 |
| rs368124274 | chr3:46252708 | 0.87 | 6  | NA         | .        |
| rs79893749  | chr3:46253650 | 0.87 | .  | NA         | 5.16E-05 |
| rs112160248 | chr3:46260225 | 0.87 | .  | NA         | .        |
| rs113341849 | chr3:46384204 | 0.86 | .  | NA         | .        |

|             |               |      |   |            |          |
|-------------|---------------|------|---|------------|----------|
| rs333       | chr3:46414943 | 0.86 | 4 | frameshift | 2.03E-05 |
| rs113010081 | chr3:46457412 | 0.86 | 5 | NA         | 2.56E-05 |
| rs3176953   | chr3:46243718 | 0.83 | 5 | NA         | 1.50E-04 |

**Supplementary Table 1 – All SNPs within  $r^2 \geq 0.8$  of most associated SNP in the *CCR3* / *CCR2* region**

Coordinates based on GRCh37.  $r^2$  calculated from CEU samples from Phase 3 of the 1000 Genomes Project. RegulomeDB key below.

**RegulomeDB Key**

- 1a - eQTL + TF binding + matched TF motif + matched DNase Footprint + DNase peak
- 1b - eQTL + TF binding + any motif + DNase Footprint + DNase peak
- 1c - eQTL + TF binding + matched TF motif + DNase peak
- 1d - eQTL + TF binding + any motif + DNase peak
- 1e - eQTL + TF binding + matched TF motif
- 1f - eQTL + TF binding / DNase peak
- 2a - TF binding + matched TF motif + matched DNase Footprint + DNase peak
- 2b - TF binding + any motif + DNase Footprint + DNase peak
- 2c - TF binding + matched TF motif + DNase peak
- 3a - TF binding + any motif + DNase peak
- 3b - TF binding + matched TF motif
- 4 - TF binding + DNase peak
- 5 - TF binding or DNase peak
- 6 - other

| RS Number  | Coordinates    | r <sup>2</sup> | RegulomeDB | Function | ImmunoChIP P-Value |
|------------|----------------|----------------|------------|----------|--------------------|
| rs1880542  | chr2:121338584 | Index          | 4          | NA       | 5.66E-06           |
| rs9308615  | chr2:121338985 | 1              | .          | NA       | .                  |
| rs2311600  | chr2:121340676 | 1              | 5          | NA       | .                  |
| rs1869026  | chr2:121341281 | 1              | 4          | NA       | .                  |
| rs11122802 | chr2:121335866 | 0.9597         | 5          | NA       | .                  |
| rs12623454 | chr2:121326297 | 0.9409         | 5          | NA       | .                  |
| rs4849906  | chr2:121342814 | 0.704          | 5          | NA       | .                  |
| rs2871815  | chr2:121345300 | 0.686          | 5          | NA       | .                  |
| rs11675851 | chr2:121346579 | 0.686          | 5          | NA       | .                  |
| rs1109426  | chr2:121345463 | 0.6685         | 2b         | NA       | .                  |
| rs3860374  | chr2:121348224 | 0.6234         | 5          | NA       | .                  |
| rs6746992  | chr2:121348472 | 0.6234         | 5          | NA       | .                  |
| rs6726610  | chr2:121350667 | 0.6085         | 6          | NA       | .                  |

**Supplementary Table 2 – All SNPs within  $r^2 \geq 0.8$  of most associated SNP in the *FLJ14816* / *GLI2* region**

Coordinates based on GRCh37.  $r^2$  calculated from CEU samples from Phase 3 of the 1000 Genomes Project. RegulomeDB key below.

**RegulomeDB Key**

- 1a - eQTL + TF binding + matched TF motif + matched DNase Footprint + DNase peak
- 1b - eQTL + TF binding + any motif + DNase Footprint + DNase peak
- 1c - eQTL + TF binding + matched TF motif + DNase peak
- 1d - eQTL + TF binding + any motif + DNase peak
- 1e - eQTL + TF binding + matched TF motif
- 1f - eQTL + TF binding / DNase peak
- 2a - TF binding + matched TF motif + matched DNase Footprint + DNase peak
- 2b - TF binding + any motif + DNase Footprint + DNase peak
- 2c - TF binding + matched TF motif + DNase peak
- 3a - TF binding + any motif + DNase peak
- 3b - TF binding + matched TF motif
- 4 - TF binding + DNase peak
- 5 - TF binding or DNase peak
- 6 - other

| RS Number  | Coordinates   | r <sup>2</sup> | RegulomeDB | Function | ImmunoChip P-Value |
|------------|---------------|----------------|------------|----------|--------------------|
| rs9396510  | chr6:14560180 | Index          | 5          | NA       | 7.52E-06           |
| rs9396511  | chr6:14560204 | 1              | 5          | NA       | .                  |
| rs9349947  | chr6:14560205 | 1              | 5          | NA       | .                  |
| rs9370753  | chr6:14560233 | 1              | 5          | NA       | .                  |
| rs9396512  | chr6:14560320 | 1              | 5          | NA       | .                  |
| rs9349948  | chr6:14560439 | 1              | 4          | NA       | .                  |
| rs9349949  | chr6:14560440 | 1              | 4          | NA       | .                  |
| rs9396509  | chr6:14559900 | 1              | .          | NA       | .                  |
| rs5874476  | chr6:14559628 | 1              | .          | NA       | .                  |
| rs1984251  | chr6:14559621 | 1              | .          | NA       | .                  |
| rs1984252  | chr6:14559575 | 1              | 5          | NA       | .                  |
| rs6914991  | chr6:14560845 | 1              | 2b         | NA       | .                  |
| rs9370754  | chr6:14560915 | 1              | 5          | NA       | .                  |
| rs1984253  | chr6:14559425 | 1              | 3a         | NA       | .                  |
| rs9349946  | chr6:14559125 | 1              | 5          | NA       | .                  |
| rs67605209 | chr6:14559001 | 1              | .          | NA       | .                  |
| rs9370752  | chr6:14558920 | 1              | 6          | NA       | .                  |
| rs9370751  | chr6:14558753 | 1              | 5          | NA       | .                  |
| rs35738380 | chr6:14558346 | 1              | .          | NA       | .                  |
| rs1891283  | chr6:14556914 | 1              | 6          | NA       | .                  |
| rs9296937  | chr6:14555508 | 1              | 6          | NA       | .                  |
| rs9396508  | chr6:14554970 | 1              | .          | NA       | .                  |
| rs6937863  | chr6:14554627 | 1              | .          | NA       | .                  |
| rs9396507  | chr6:14554373 | 1              | 5          | NA       | .                  |
| rs9396506  | chr6:14554009 | 1              | 6          | NA       | .                  |
| rs9396505  | chr6:14551974 | 1              | 5          | NA       | .                  |
| rs9370750  | chr6:14551481 | 1              | 5          | NA       | .                  |
| rs1001539  | chr6:14550793 | 1              | 3a         | NA       | .                  |
| rs16875127 | chr6:14549785 | 1              | 4          | NA       | .                  |
| rs9358037  | chr6:14548821 | 1              | .          | NA       | .                  |
| rs2179092  | chr6:14547906 | 1              | 5          | NA       | .                  |
| rs4331989  | chr6:14547702 | 1              | 5          | NA       | .                  |
| rs78895936 | chr6:14546968 | 1              | 6          | NA       | .                  |
| rs58399222 | chr6:14546112 | 1              | .          | NA       | .                  |
| rs733792   | chr6:14544219 | 1              | 5          | NA       | .                  |
| rs7758992  | chr6:14541957 | 1              | .          | NA       | .                  |
| rs3817761  | chr6:14540994 | 1              | 5          | NA       | .                  |
| rs3817760  | chr6:14540915 | 1              | 5          | NA       | .                  |
| rs3817758  | chr6:14540747 | 1              | 4          | NA       | .                  |
| rs3817757  | chr6:14540738 | 1              | 4          | NA       | .                  |
| rs2142608  | chr6:14540495 | 1              | 5          | NA       | .                  |
| rs9349945  | chr6:14539891 | 1              | 6          | NA       | .                  |
| rs7774975  | chr6:14539376 | 1              | 5          | NA       | .                  |
| rs7774347  | chr6:14539036 | 1              | 5          | NA       | .                  |
| rs9382981  | chr6:14561986 | 0.8704         | .          | NA       | .                  |
| rs9349950  | chr6:14562744 | 0.8704         | 6          | NA       | .                  |
| rs9367843  | chr6:14562909 | 0.8704         | 6          | NA       | .                  |
| rs75171351 | chr6:14563461 | 0.8704         | .          | NA       | .                  |
| rs76743380 | chr6:14563586 | 0.8704         | 4          | NA       | .                  |
| rs79137793 | chr6:14563785 | 0.8704         | 4          | NA       | .                  |

|             |               |        |    |    |   |
|-------------|---------------|--------|----|----|---|
| rs6906503   | chr6:14564186 | 0.8704 | 6  | NA | . |
| rs6901847   | chr6:14564196 | 0.8704 | .  | NA | . |
| rs6922613   | chr6:14564246 | 0.8704 | .  | NA | . |
| rs6922934   | chr6:14564362 | 0.8704 | .  | NA | . |
| rs6922038   | chr6:14564648 | 0.8704 | 6  | NA | . |
| rs57653370  | chr6:14564854 | 0.8704 | 6  | NA | . |
| rs9396513   | chr6:14565123 | 0.8704 | 5  | NA | . |
| rs9396514   | chr6:14565438 | 0.8704 | .  | NA | . |
| rs77677669  | chr6:14565727 | 0.8704 | .  | NA | . |
| rs9396515   | chr6:14565902 | 0.8704 | .  | NA | . |
| rs9370756   | chr6:14566072 | 0.8704 | .  | NA | . |
| rs9396516   | chr6:14566086 | 0.8704 | 6  | NA | . |
| rs9396517   | chr6:14566273 | 0.8704 | .  | NA | . |
| rs9370757   | chr6:14566428 | 0.8704 | .  | NA | . |
| rs9396518   | chr6:14566548 | 0.8704 | .  | NA | . |
| rs9396519   | chr6:14566787 | 0.8704 | .  | NA | . |
| rs6919797   | chr6:14567096 | 0.8704 | 6  | NA | . |
| rs6924439   | chr6:14567145 | 0.8704 | 6  | NA | . |
| rs9358038   | chr6:14568186 | 0.8704 | 3a | NA | . |
| rs9367844   | chr6:14568650 | 0.8704 | .  | NA | . |
| rs9296935   | chr6:14551477 | 0.8704 | 5  | NA | . |
| rs112194433 | chr6:14571609 | 0.8704 | 6  | NA | . |
| rs6938103   | chr6:14572336 | 0.8704 | 5  | NA | . |
| rs6939631   | chr6:14572428 | 0.8704 | 6  | NA | . |
| rs57574258  | chr6:14573098 | 0.8704 | 6  | NA | . |
| rs74647227  | chr6:14573212 | 0.8704 | 6  | NA | . |
| rs6459362   | chr6:14573435 | 0.8704 | 6  | NA | . |
| rs16875212  | chr6:14573948 | 0.8704 | 5  | NA | . |
| rs9382982   | chr6:14574161 | 0.8704 | 5  | NA | . |
| rs71782543  | chr6:14574318 | 0.8704 | .  | NA | . |
| rs9367845   | chr6:14579640 | 0.8704 | .  | NA | . |

**Supplementary Table 3 – All SNPs within  $r^2 \geq 0.8$  of most associated SNP in the *LOC100128517* / *LOC728961* region**

Coordinates based on GRCh37.  $r^2$  calculated from CEU samples from Phase 3 of the 1000 Genomes Project. RegulomeDB key below.

**RegulomeDB Key**

- 1a - eQTL + TF binding + matched TF motif + matched DNase Footprint + DNase peak
- 1b - eQTL + TF binding + any motif + DNase Footprint + DNase peak
- 1c - eQTL + TF binding + matched TF motif + DNase peak
- 1d - eQTL + TF binding + any motif + DNase peak
- 1e - eQTL + TF binding + matched TF motif
- 1f - eQTL + TF binding / DNase peak
- 2a - TF binding + matched TF motif + matched DNase Footprint + DNase peak
- 2b - TF binding + any motif + DNase Footprint + DNase peak
- 2c - TF binding + matched TF motif + DNase peak
- 3a - TF binding + any motif + DNase peak
- 3b - TF binding + matched TF motif
- 4 - TF binding + DNase peak
- 5 - TF binding or DNase peak
- 6 - other

| Gene     | Allele (HLA)  | P-Value  |
|----------|---------------|----------|
| HLA_DRB1 | HLA_DRB1_0301 | 5.77E-34 |
| HLA_DRB1 | HLA_DRB1_03   | 7.97E-34 |
| HLA_DQB1 | HLA_DQB1_0201 | 3.88E-33 |
| HLA_B    | HLA_B_0801    | 2.28E-26 |
| HLA_B    | HLA_B_08      | 2.29E-26 |
| HLA_DQA1 | HLA_DQA1_05   | 2.25E-21 |
| HLA_DQA1 | HLA_DQA1_0501 | 2.25E-21 |
| HLA_C    | HLA_C_0701    | 4.93E-20 |
| HLA_DQB1 | HLA_DQB1_02   | 1.66E-17 |
| HLA_DQB1 | HLA_DQB1_03   | 1.09E-14 |
| HLA_DRB1 | HLA_DRB1_0101 | 7.25E-12 |
| HLA_DQA1 | HLA_DQA1_0301 | 8.62E-12 |
| HLA_DQA1 | HLA_DQA1_03   | 8.63E-12 |
| HLA_DRB1 | HLA_DRB1_04   | 5.15E-11 |
| HLA_DRB1 | HLA_DRB1_1501 | 1.61E-09 |
| HLA_A    | HLA_A_0101    | 2.15E-09 |
| HLA_A    | HLA_A_01      | 2.16E-09 |
| HLA_DQA1 | HLA_DQA1_0102 | 4.12E-09 |
| HLA_DQB1 | HLA_DQB1_0602 | 4.54E-09 |
| HLA_DRB1 | HLA_DRB1_15   | 7.15E-09 |
| HLA_DQB1 | HLA_DQB1_0501 | 2.69E-08 |
| HLA_DRB1 | HLA_DRB1_0701 | 3.71E-08 |
| HLA_DRB1 | HLA_DRB1_07   | 3.72E-08 |
| HLA_DRB1 | HLA_DRB1_01   | 4.58E-08 |
| HLA_DQA1 | HLA_DQA1_0201 | 4.59E-08 |
| HLA_DQA1 | HLA_DQA1_02   | 4.60E-08 |
| HLA_DRB1 | HLA_DRB1_0401 | 1.20E-07 |
| HLA_DQB1 | HLA_DQB1_0302 | 1.25E-07 |
| HLA_B    | HLA_B_07      | 6.20E-07 |
| HLA_B    | HLA_B_0702    | 9.43E-07 |
| HLA_DPB1 | HLA_DPB1_01   | 4.85E-06 |
| HLA_DPB1 | HLA_DPB1_0101 | 4.85E-06 |

**Supplementary Table 4 - HLA Imputation in 252 IBM patients**

Classical HLA alleles reaching significance ( $6.8 \times 10^{-6}$ )



| Gene     | Allele (HLA)  | P-Value  |
|----------|---------------|----------|
| HLA_DRB1 | HLA_DRB1_0101 | 1.56E-16 |
| HLA_DQB1 | HLA_DQB1_0501 | 1.04E-13 |
| HLA_DRB1 | HLA_DRB1_01   | 6.34E-13 |
| HLA_DQB1 | HLA_DQB1_05   | 7.10E-11 |
| HLA_DQA1 | HLA_DQA1_0101 | 8.80E-10 |
| HLA_DRB1 | HLA_DRB1_1501 | 1.29E-07 |
| HLA_DRB1 | HLA_DRB1_04   | 2.30E-07 |
| HLA_DQA1 | HLA_DQA1_0301 | 2.52E-07 |
| HLA_DQA1 | HLA_DQA1_03   | 2.52E-07 |
| HLA_DQB1 | HLA_DQB1_0602 | 4.78E-07 |
| HLA_B    | HLA_B_3501    | 1.33E-06 |
| HLA_DQA1 | HLA_DQA1_01   | 2.41E-06 |
| HLA_DQB1 | HLA_DQB1_0302 | 2.78E-06 |
| HLA_DRB1 | HLA_DRB1_15   | 2.92E-06 |
| HLA_DQA1 | HLA_DQA1_0201 | 4.05E-06 |
| HLA_DQA1 | HLA_DQA1_02   | 4.06E-06 |
| HLA_DRB1 | HLA_DRB1_0701 | 4.09E-06 |
| HLA_DRB1 | HLA_DRB1_07   | 4.09E-06 |

**Supplementary Table 5 - HLA Imputation in 252 IBM patients conditional on HLA-DRB1\*03:01**

Classical HLA alleles reaching significance ( $6.8 \times 10^{-6}$ )

| Gene     | Allele (HLA)  | P-Value  |
|----------|---------------|----------|
| HLA_DQA1 | HLA_DQA1_0103 | 4.14E-09 |
| HLA_DQB1 | HLA_DQB1_0603 | 2.01E-08 |
| HLA_DRB1 | HLA_DRB1_1301 | 3.28E-08 |

**Supplementary Table 6 - HLA Imputation in 252 IBM patients conditional on HLA-DRB1\*03:01 and HLA-DRB1\*01:01**

Classical HLA alleles reaching significance ( $6.8 \times 10^{-6}$ )

| Gene | Amino acid (AA) | P-Value  |
|------|-----------------|----------|
| DRB1 | AA_DRB1_26      | 5.22E-43 |
| DRB1 | AA_DRB1_74      | 3.31E-41 |
| DRB1 | AA_DRB1_11      | 1.88E-37 |
| DRB1 | AA_DRB1_13      | 3.00E-37 |
| DQA1 | AA_DQA1_53      | 4.52E-35 |
| DQA1 | AA_DQA1_50      | 4.52E-35 |
| DQA1 | AA_DQA1_47      | 4.40E-34 |
| DRB1 | AA_DRB1_77      | 7.69E-34 |
| DRB1 | AA_DRB1_37      | 1.07E-32 |
| DQA1 | AA_DQA1_175     | 3.19E-31 |
| DRB1 | AA_DRB1_104     | 2.81E-29 |
| DRB1 | AA_DRB1_98      | 2.81E-29 |
| DQB1 | AA_DQB1_30      | 2.91E-29 |
| DQA1 | AA_DQA1_215     | 3.40E-29 |
| DQB1 | AA_DQB1_74      | 5.96E-29 |
| DQB1 | AA_DQB1_71      | 5.39E-28 |
| B    | AA_B_67         | 1.91E-27 |
| B    | AA_B_9          | 2.34E-27 |
| DQB1 | AA_DQB1_75      | 2.24E-25 |
| DQB1 | AA_DQB1_38      | 5.00E-24 |
| DRB1 | AA_DRB1_96      | 9.03E-24 |
| DQB1 | AA_DQB1_55      | 1.41E-23 |
| DQB1 | AA_DQB1_77      | 1.94E-23 |
| DQA1 | AA_DQA1_107     | 6.75E-23 |
| DQA1 | AA_DQA1_161     | 7.36E-23 |
| DQA1 | AA_DQA1_163     | 7.36E-23 |
| DQA1 | AA_DQA1_156     | 7.41E-23 |
| DQA1 | AA_DQA1_75      | 2.25E-21 |
| DQA1 | AA_DQA1_51      | 2.33E-21 |
| DQA1 | AA_DQA1_40      | 2.33E-21 |
| B    | AA_B_163        | 9.92E-21 |
| DRB1 | AA_DRB1_67      | 4.10E-20 |
| DRB1 | AA_DRB1_32      | 6.75E-20 |
| C    | AA_C_66         | 8.33E-20 |
| DRB1 | AA_DRB1_149     | 2.30E-19 |
| DRB1 | AA_DRB1_10      | 3.38E-19 |
| DRB1 | AA_DRB1_-25     | 4.58E-19 |
| DRB1 | AA_DRB1_-16     | 4.67E-19 |
| DRB1 | AA_DRB1_233     | 4.67E-19 |
| DQB1 | AA_DQB1_67      | 9.01E-19 |
| DQB1 | AA_DQB1_66      | 9.10E-19 |
| DRB1 | AA_DRB1_71      | 2.39E-18 |
| DQB1 | AA_DQB1_37      | 3.20E-18 |
| DRB1 | AA_DRB1_12      | 1.01E-17 |
| DQB1 | AA_DQB1_-10     | 1.01E-17 |
| DQB1 | AA_DQB1_28      | 1.65E-17 |
| DQB1 | AA_DQB1_52      | 1.67E-17 |
| DQB1 | AA_DQB1_46      | 1.68E-17 |
| DQB1 | AA_DQB1_47      | 1.68E-17 |
| DQA1 | AA_DQA1_56      | 2.75E-17 |
| DQA1 | AA_DQA1_76      | 2.75E-17 |

|      |             |          |
|------|-------------|----------|
| DQA1 | AA_DQA1_187 | 3.18E-16 |
| B    | AA_B_156    | 4.41E-16 |
| DRB1 | AA_DRB1_60  | 4.99E-16 |
| DRB1 | AA_DRB1_57  | 2.94E-15 |
| DRB1 | AA_DRB1_30  | 9.11E-15 |
| DRB1 | AA_DRB1_180 | 1.56E-14 |
| DRB1 | AA_DRB1_120 | 1.67E-14 |
| DRB1 | AA_DRB1_-24 | 2.51E-14 |
| DQB1 | AA_DQB1_140 | 3.13E-14 |
| DQB1 | AA_DQB1_182 | 3.17E-14 |
| DRB1 | AA_DRB1_73  | 2.75E-12 |
| DQB1 | AA_DQB1_57  | 2.86E-12 |
| B    | AA_B_178    | 3.77E-12 |
| DRB1 | AA_DRB1_4   | 3.81E-12 |
| DQA1 | AA_DQA1_26  | 8.62E-12 |
| DQA1 | AA_DQA1_52  | 2.70E-11 |
| DRB1 | AA_DRB1_33  | 5.07E-11 |
| DQA1 | AA_DQA1_207 | 6.52E-11 |
| DQB1 | AA_DQB1_185 | 9.03E-11 |
| DRB1 | AA_DRB1_-1  | 1.14E-10 |
| DRB1 | AA_DRB1_181 | 1.70E-10 |
| DQA1 | AA_DQA1_34  | 4.15E-10 |
| B    | AA_B_63     | 2.00E-09 |
| A    | AA_A_150    | 2.15E-09 |
| A    | AA_A_158    | 2.16E-09 |
| A    | AA_A_44     | 2.60E-09 |
| A    | AA_A_67     | 2.80E-09 |
| A    | AA_A_163    | 3.14E-09 |
| B    | AA_B_24     | 3.26E-09 |
| A    | AA_A_90     | 7.89E-09 |
| DRB1 | AA_DRB1_47  | 8.21E-09 |
| DRB1 | AA_DRB1_78  | 9.65E-09 |
| A    | AA_A_152    | 1.03E-08 |
| B    | AA_B_41     | 1.24E-08 |
| B    | AA_B_69     | 1.26E-08 |
| B    | AA_B_45     | 1.56E-08 |
| DRB1 | AA_DRB1_142 | 1.64E-08 |
| DRB1 | AA_DRB1_133 | 1.67E-08 |
| DRB1 | AA_DRB1_25  | 3.66E-08 |
| DRB1 | AA_DRB1_14  | 3.71E-08 |
| DRB1 | AA_DRB1_70  | 3.82E-08 |
| DQA1 | AA_DQA1_54  | 4.59E-08 |
| A    | AA_A_156    | 5.71E-08 |
| B    | AA_B_32     | 7.04E-08 |
| B    | AA_B_12     | 8.42E-08 |
| B    | AA_B_113    | 9.81E-08 |
| B    | AA_B_70     | 1.08E-07 |
| B    | AA_B_71     | 1.13E-07 |
| DQB1 | AA_DQB1_9   | 1.94E-07 |
| DQB1 | AA_DQB1_135 | 2.73E-07 |
| B    | AA_B_114    | 4.68E-07 |
| B    | AA_B_97     | 8.09E-07 |

|      |             |          |
|------|-------------|----------|
| A    | AA_A_76     | 1.02E-06 |
| DQB1 | AA_DQB1_-18 | 1.10E-06 |
| DQB1 | AA_DQB1_125 | 1.18E-06 |
| A    | AA_A_105    | 1.18E-06 |
| A    | AA_A_276    | 1.78E-06 |
| A    | AA_A_321    | 1.83E-06 |
| DRB1 | AA_DRB1_31  | 2.01E-06 |
| DQB1 | AA_DQB1_26  | 2.14E-06 |
| DQB1 | AA_DQB1_-5  | 2.45E-06 |
| B    | AA_B_11     | 2.51E-06 |
| C    | AA_C_99     | 4.88E-06 |
| DPB1 | AA_DPB1_194 | 4.95E-06 |
| A    | AA_A_97     | 5.64E-06 |

**Supplementary Table 7 - HLA amino acid imputation in 252 IBM patients**

Amino acids reaching significance ( $6.8 \times 10^{-6}$ )

| Gene | Amino acid (AA) | P-Value  |
|------|-----------------|----------|
| DRB1 | AA_DRB1_11      | 3.80E-13 |
| DRB1 | AA_DRB1_104     | 3.69E-11 |
| DRB1 | AA_DRB1_98      | 3.69E-11 |
| DQA1 | AA_DQA1_215     | 4.08E-11 |
| DQA1 | AA_DQA1_53      | 1.52E-10 |
| DQA1 | AA_DQA1_50      | 1.52E-10 |
| DRB1 | AA_DRB1_149     | 3.06E-10 |
| DRB1 | AA_DRB1_10      | 4.22E-10 |
| DRB1 | AA_DRB1_12      | 4.22E-10 |
| DRB1 | AA_DRB1_13      | 5.24E-10 |
| DQA1 | AA_DQA1_47      | 8.32E-10 |
| DRB1 | AA_DRB1_233     | 8.91E-10 |
| DRB1 | AA_DRB1_25      | 2.54E-09 |
| DRB1 | AA_DRB1_16      | 2.56E-09 |
| DRB1 | AA_DRB1_57      | 3.02E-09 |
| DQA1 | AA_DQA1_41      | 3.14E-09 |
| DQA1 | AA_DQA1_130     | 3.37E-09 |
| DRB1 | AA_DRB1_60      | 3.54E-09 |
| DRB1 | AA_DRB1_37      | 7.84E-09 |
| DRB1 | AA_DRB1_74      | 6.08E-08 |
| DRB1 | AA_DRB1_181     | 1.80E-07 |
| DQA1 | AA_DQA1_34      | 3.19E-07 |
| DRB1 | AA_DRB1_30      | 3.99E-07 |
| B    | AA_B_67         | 4.75E-07 |
| DQA1 | AA_DQA1_26      | 7.81E-07 |
| DQA1 | AA_DQA1_187     | 8.14E-07 |
| DQB1 | AA_DQB1_30      | 1.06E-06 |
| DRB1 | AA_DRB1_4       | 1.44E-06 |
| DRB1 | AA_DRB1_78      | 1.49E-06 |
| DRB1 | AA_DRB1_28      | 2.23E-06 |
| DQA1 | AA_DQA1_56      | 4.15E-06 |
| DQA1 | AA_DQA1_76      | 4.15E-06 |
| DRB1 | AA_DRB1_70      | 4.16E-06 |
| DRB1 | AA_DRB1_96      | 5.46E-06 |
| DQA1 | AA_DQA1_175     | 6.31E-06 |

**Supplementary Table 8 - HLA amino acid imputation in 252 IBM patients conditional on HLA-DRB1 amino acid position 26**

Amino acids reaching significance ( $6.8 \times 10^{-6}$ )

| Gene     | Allele (HLA) / Amino acid (AA) | P-Value  |
|----------|--------------------------------|----------|
| DQA1     | AA_DQA1_53                     | 5.49E-13 |
| DQA1     | AA_DQA1_50                     | 5.49E-13 |
| DRB1     | AA_DRB1_13                     | 5.93E-13 |
| DQA1     | AA_DQA1_47                     | 1.62E-12 |
| DRB1     | AA_DRB1_11                     | 1.81E-12 |
| DRB1     | AA_DRB1_74                     | 1.95E-11 |
| DQA1     | AA_DQA1_215                    | 8.38E-11 |
| DRB1     | AA_DRB1_104                    | 8.40E-11 |
| DRB1     | AA_DRB1_98                     | 8.40E-11 |
| DQA1     | AA_DQA1_175                    | 1.46E-10 |
| DRB1     | AA_DRB1_26                     | 2.67E-09 |
| DRB1     | AA_DRB1_149                    | 6.65E-09 |
| DRB1     | AA_DRB1_10                     | 7.36E-09 |
| DQA1     | AA_DQA1_107                    | 3.98E-08 |
| DQA1     | AA_DQA1_156                    | 3.98E-08 |
| DQA1     | AA_DQA1_161                    | 3.98E-08 |
| DQA1     | AA_DQA1_163                    | 3.98E-08 |
| HLA_DRB1 | HLA_DRB1_03                    | 5.58E-08 |
| DRB1     | AA_DRB1_77                     | 5.61E-08 |
| HLA_DRB1 | HLA_DRB1_0301                  | 5.62E-08 |
| DRB1     | AA_DRB1_-16                    | 6.18E-08 |
| DRB1     | AA_DRB1_-25                    | 6.18E-08 |
| HLA_DQB1 | HLA_DQB1_0201                  | 1.72E-07 |
| DRB1     | AA_DRB1_233                    | 2.20E-07 |
| DRB1     | AA_DRB1_96                     | 3.42E-07 |
| DRB1     | AA_DRB1_12                     | 6.16E-07 |
| DQA1     | AA_DQA1_40                     | 7.03E-07 |
| DQA1     | AA_DQA1_51                     | 7.03E-07 |
| DQA1     | AA_DQA1_75                     | 8.41E-07 |
| HLA_DQA1 | HLA_DQA1_05                    | 8.41E-07 |
| HLA_DQA1 | HLA_DQA1_0501                  | 8.41E-07 |
| DRB1     | AA_DRB1_37                     | 1.96E-06 |
| DQA1     | AA_DQA1_187                    | 2.90E-06 |
| DQA1     | AA_DQA1_56                     | 3.42E-06 |
| DQA1     | AA_DQA1_76                     | 3.42E-06 |
| DRB1     | AA_DRB1_120                    | 5.94E-06 |

**Supplementary Table 9 - HLA Imputation in 35 anti-CN-1A positive patients and 140 healthy controls**

HLA alleles and amino acids reaching significance ( $6.8 \times 10^{-6}$ )

| HLA allele or Genotype | Number of individuals<br>(present/absent) | Mean age of onset present<br>(years) | Mean age of onset<br>absent (years) | p-value |
|------------------------|-------------------------------------------|--------------------------------------|-------------------------------------|---------|
| DRB1*01:01             | 48/76                                     | 61.5                                 | 60                                  | 0.44    |
| DRB1*03:01             | 92/32                                     | 60.5                                 | 60.8                                | 0.86    |
| DRB1*13:01             | 24/100                                    | 61.7                                 | 60.3                                | 0.52    |
| DRB1*01:01/01:01       | 4/120                                     | 68                                   | 60.3                                | 0.1     |
| DRB1*03:01/03:01       | 5/119                                     | 56.3                                 | 60.8                                | 0.31    |
| DRB1*13:01/13:01       | 0/124                                     | N/A                                  | N/A                                 | N/A     |
| DRB1*01:01/03:01       | 35/89                                     | 60.7                                 | 60.5                                | 0.92    |
| DRB1*03:01/13:01       | 15/109                                    | 63.1                                 | 60.2                                | 0.3     |
| DRB1*01:01/13:01       | 3/121                                     | 62.6                                 | 60.5                                | 0.72    |
| DRB1*01:01/Non-risk    | 6/118                                     | 60.8                                 | 60.6                                | 0.95    |
| DRB1*03:01/Non-risk    | 37/87                                     | 59.8                                 | 60.9                                | 0.56    |
| DRB1*13:01/Non-risk    | 6/118                                     | 58                                   | 60.7                                | 0.51    |
| Non-risk/Non-risk      | 13/111                                    | 59.6                                 | 60.7                                | 0.71    |

**Supplementary Table 10 - Linear regression analysis for the relationship of HLA-DRB1 genotypes and age of onset in 124 IBM patients**

\*non-risk defined as any allele not previously reported as conferring an earlier age of onset (HLA-DRB1\*01:01, HLA-DRB1\*03:01 and HLA-DRB1\*13:01)
